# Supplementary material
Source: HighWire-hosted journal article supplement (https://bmjopen.bmj.com/content/15/5/e093157)

**Supplemental Figure 1. Overall number of journal publications per year, 2013-2023.**

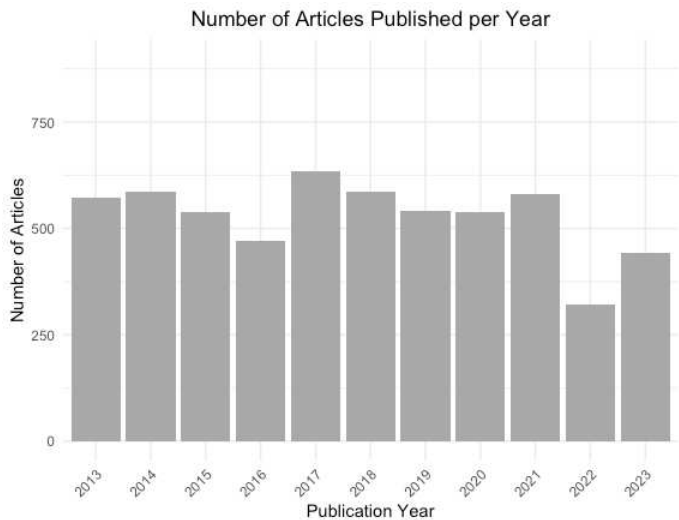

Supplement: inline-supplementary-material-1 [file inline-supplementary-material-1.pdf]
